# Supplementary material
Source: publisher figshare collection journal article supplement (https://acs.figshare.com/ndownloader/files/4675552)

*Supporting information:*

**Crystallization of polymer brushes with poly(ethylene oxide) side-chains**

Ying Zheng, Merlin, L. Bruening,\* Gregory L. Baker\*

Department of Chemistry, Michigan State University, East Lansing, MI, 48824

[zhengyin@msu.edu](mailto:zhengyin@msu.edu), [bruening@chemistry.msu.edu](mailto:bruening@chemistry.msu.edu), [bakerg@msu.edu](mailto:bakerg@msu.edu)

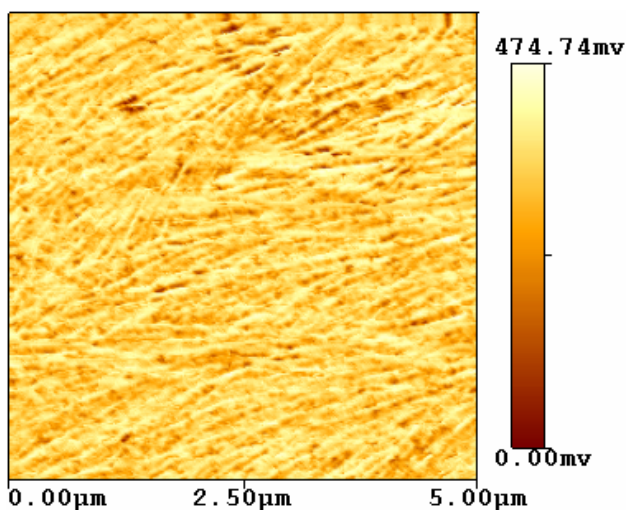

**Figure S-1.** AFM Phase images (5 × 5 μm) of crystalline polymer brushes with thicknesses of (a) 92 nm; (b) 35 nm.

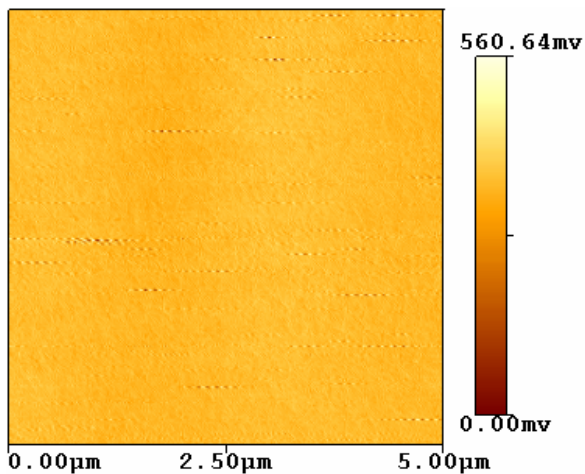

Supplement: Supplementary file 1 [file 4675552]
